# Supplementary material for: Vaccination coverage among children in Germany estimated by analysis of health insurance claims data
Source: PubMed Central journal article supplement — Hum Vaccin Immunother. 2013 Nov 5;10(2):476–84. doi: 10.4161/hv.26986 (PMC4185903; doi:10.4161/hv.26986), 2013-11-05
Supplement: hvi-10-476-s02.pdf [file hvi-10-476-s02.pdf]

## **Supplemental Material to:**

**Thorsten Rieck, Marcel Feig, Tim Eckmanns, Justus Benzler,  
Anette Siedler, and Ole Wichmann**

**Vaccination coverage among children in Germany  
estimated by analysis of health insurance claims data**

**Human Vaccines & Immunotherapeutics 2013; 10(2)  
<http://dx.doi.org/10.4161/hv.26986>**

**[www.landesbioscience.com/journals/vaccines/article/26986](http://www.landesbioscience.com/journals/vaccines/article/26986)**

**[www.landesbioscience.com/journals/vaccines/article/26986/2013HV0337R\\_ST1.xls](http://www.landesbioscience.com/journals/vaccines/article/26986/2013HV0337R_ST1.xls)**
